# Supplementary figures and images for: Fatty Acid Biosynthesis in Chromerids
Source: MDPI journal article supplement (doi:10.3390/biom10081102), 2020-07-24

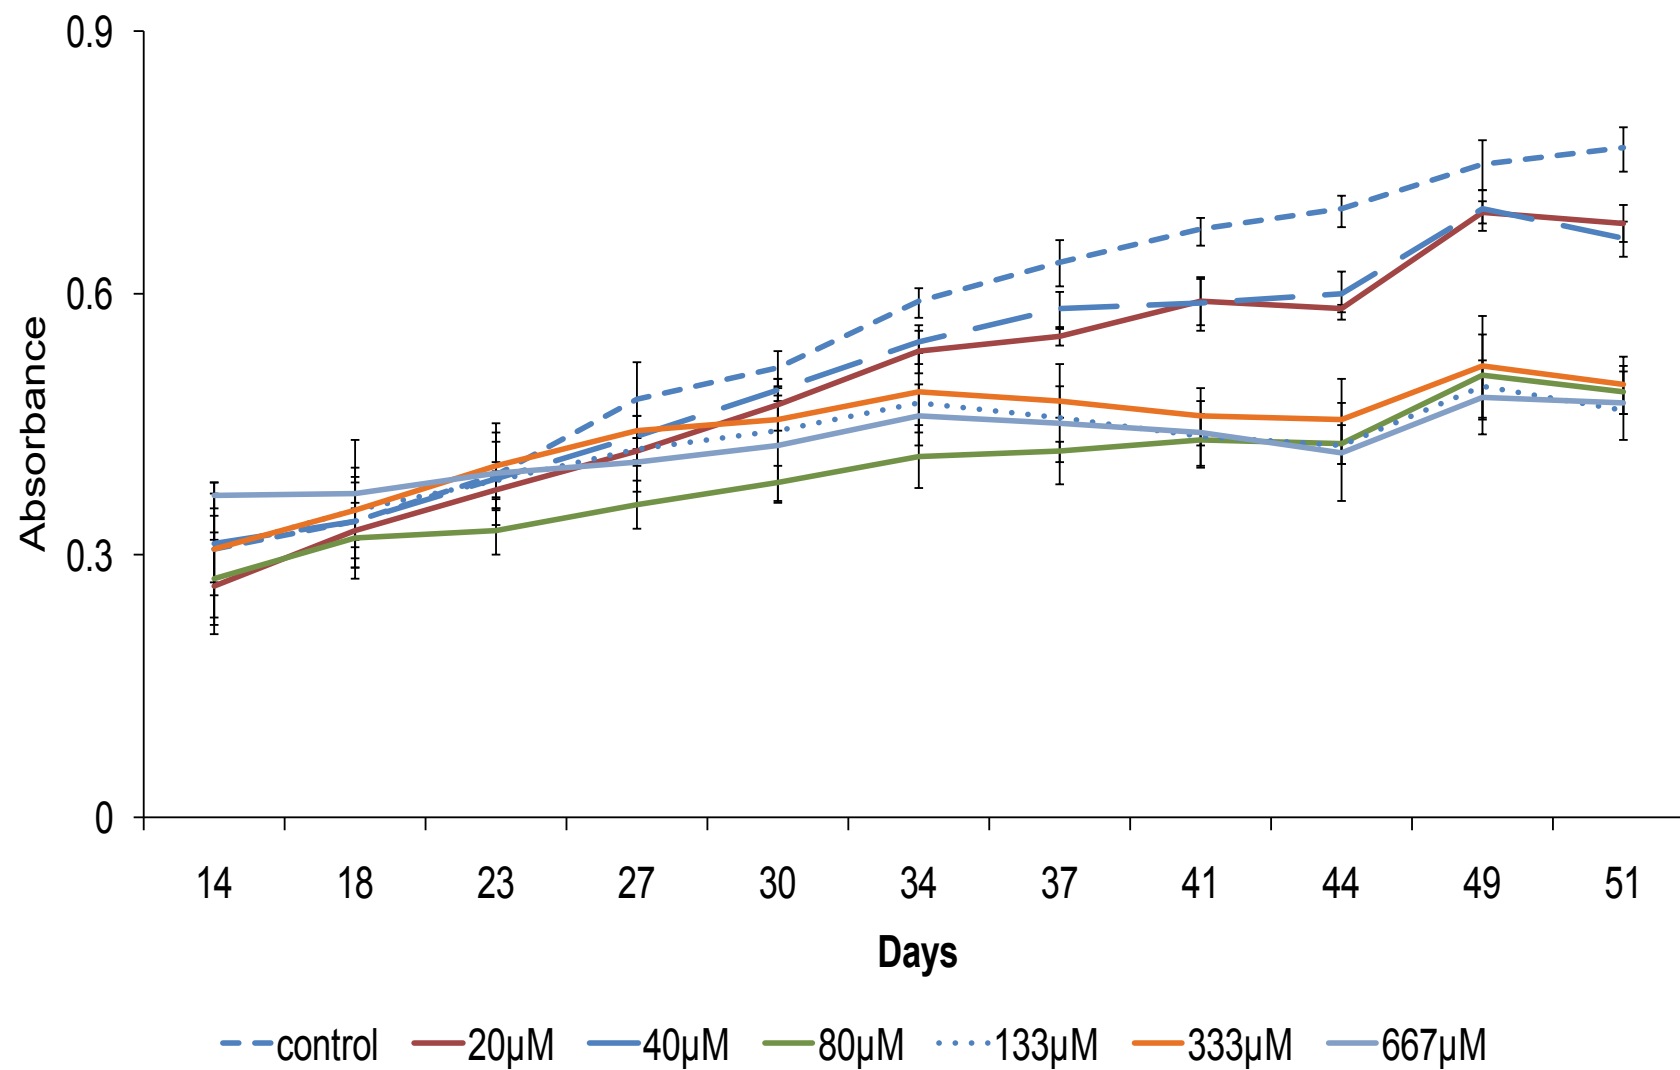

Supplement: s1 [file s1]

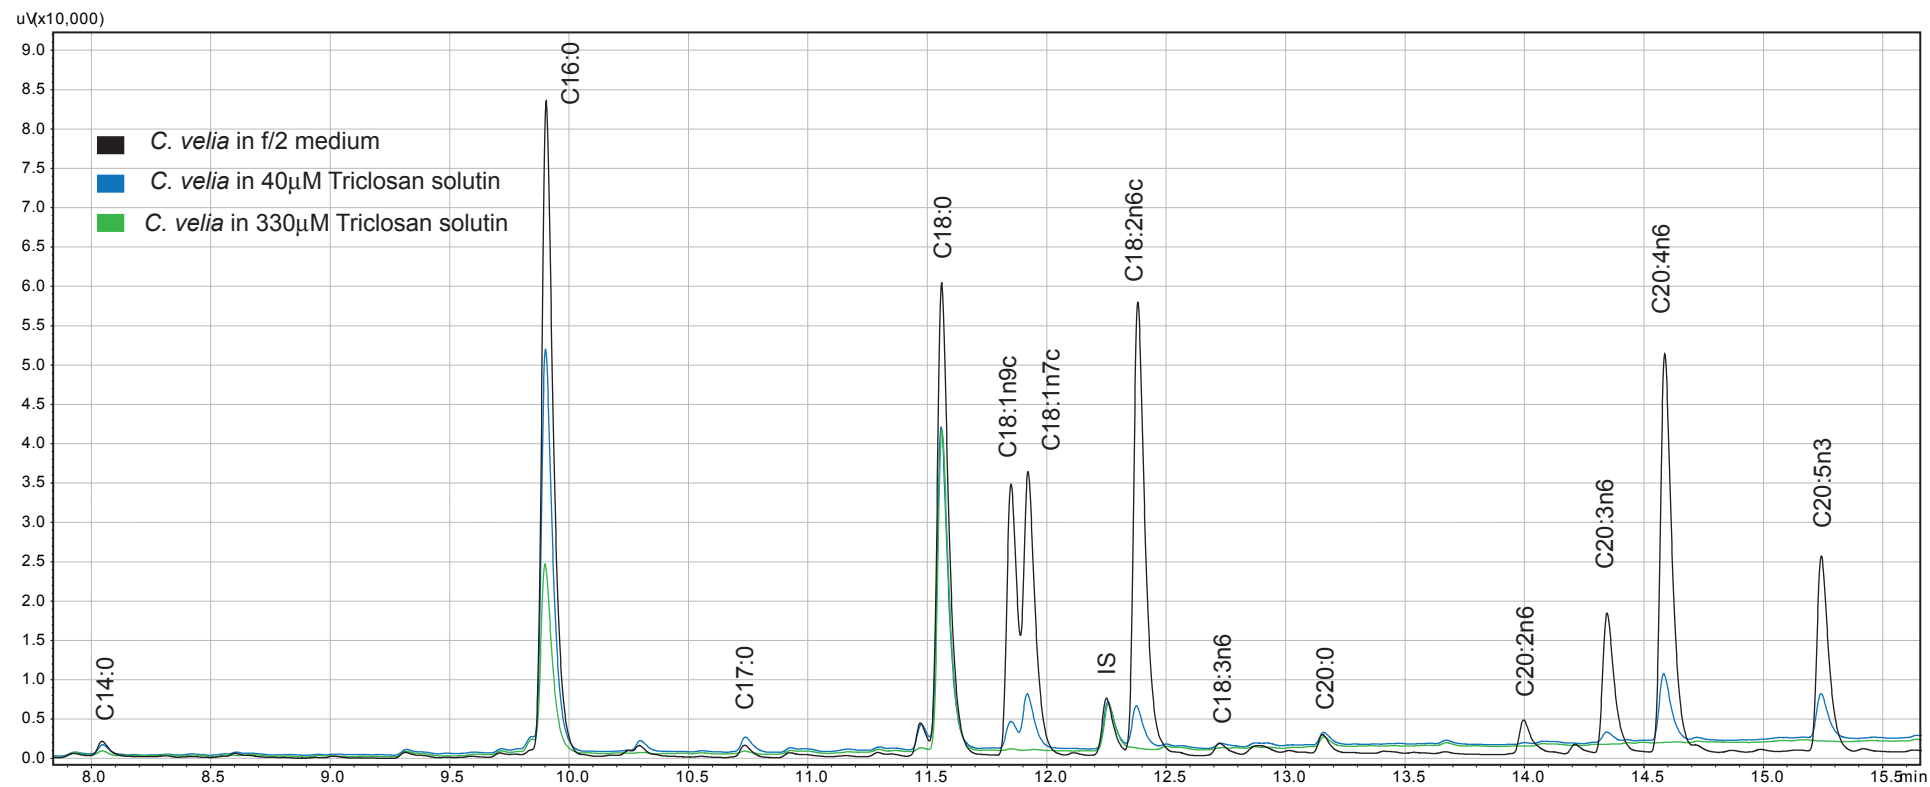

Supplement: s1 [file s1]

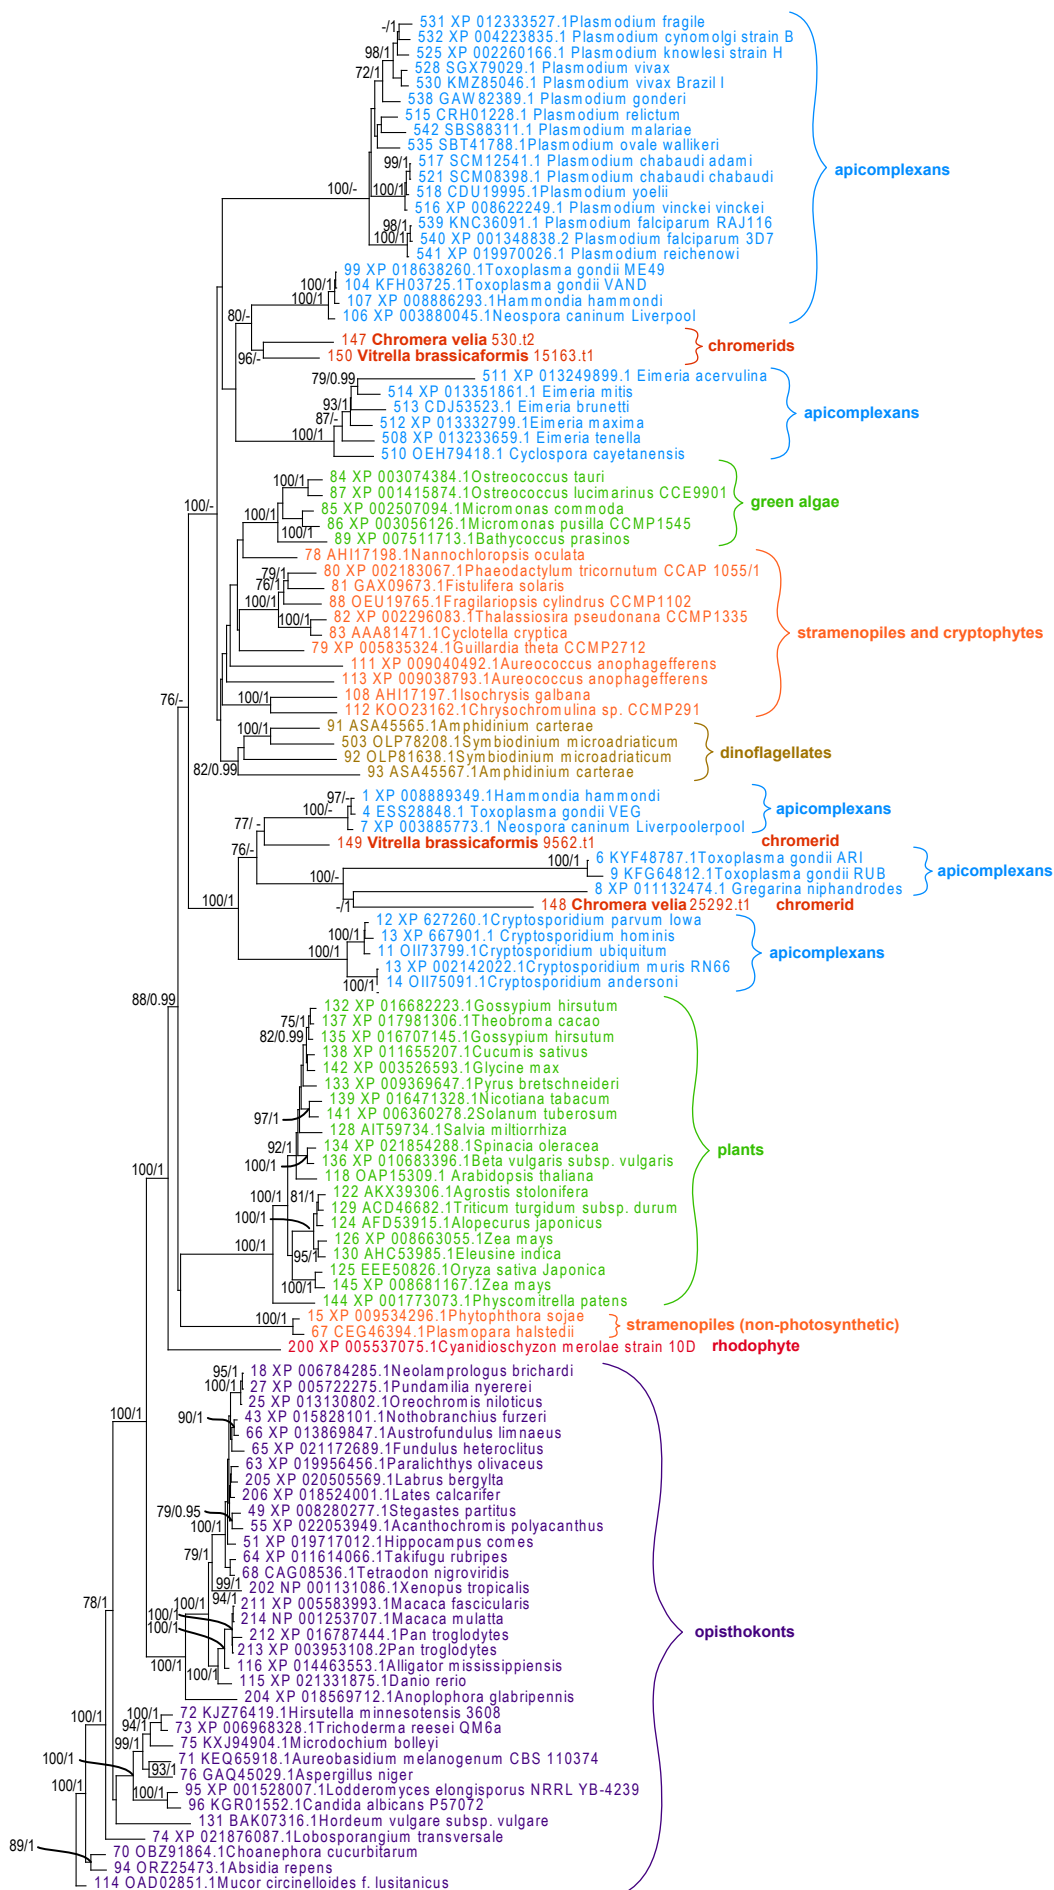

Supplement: s1 [file s1]

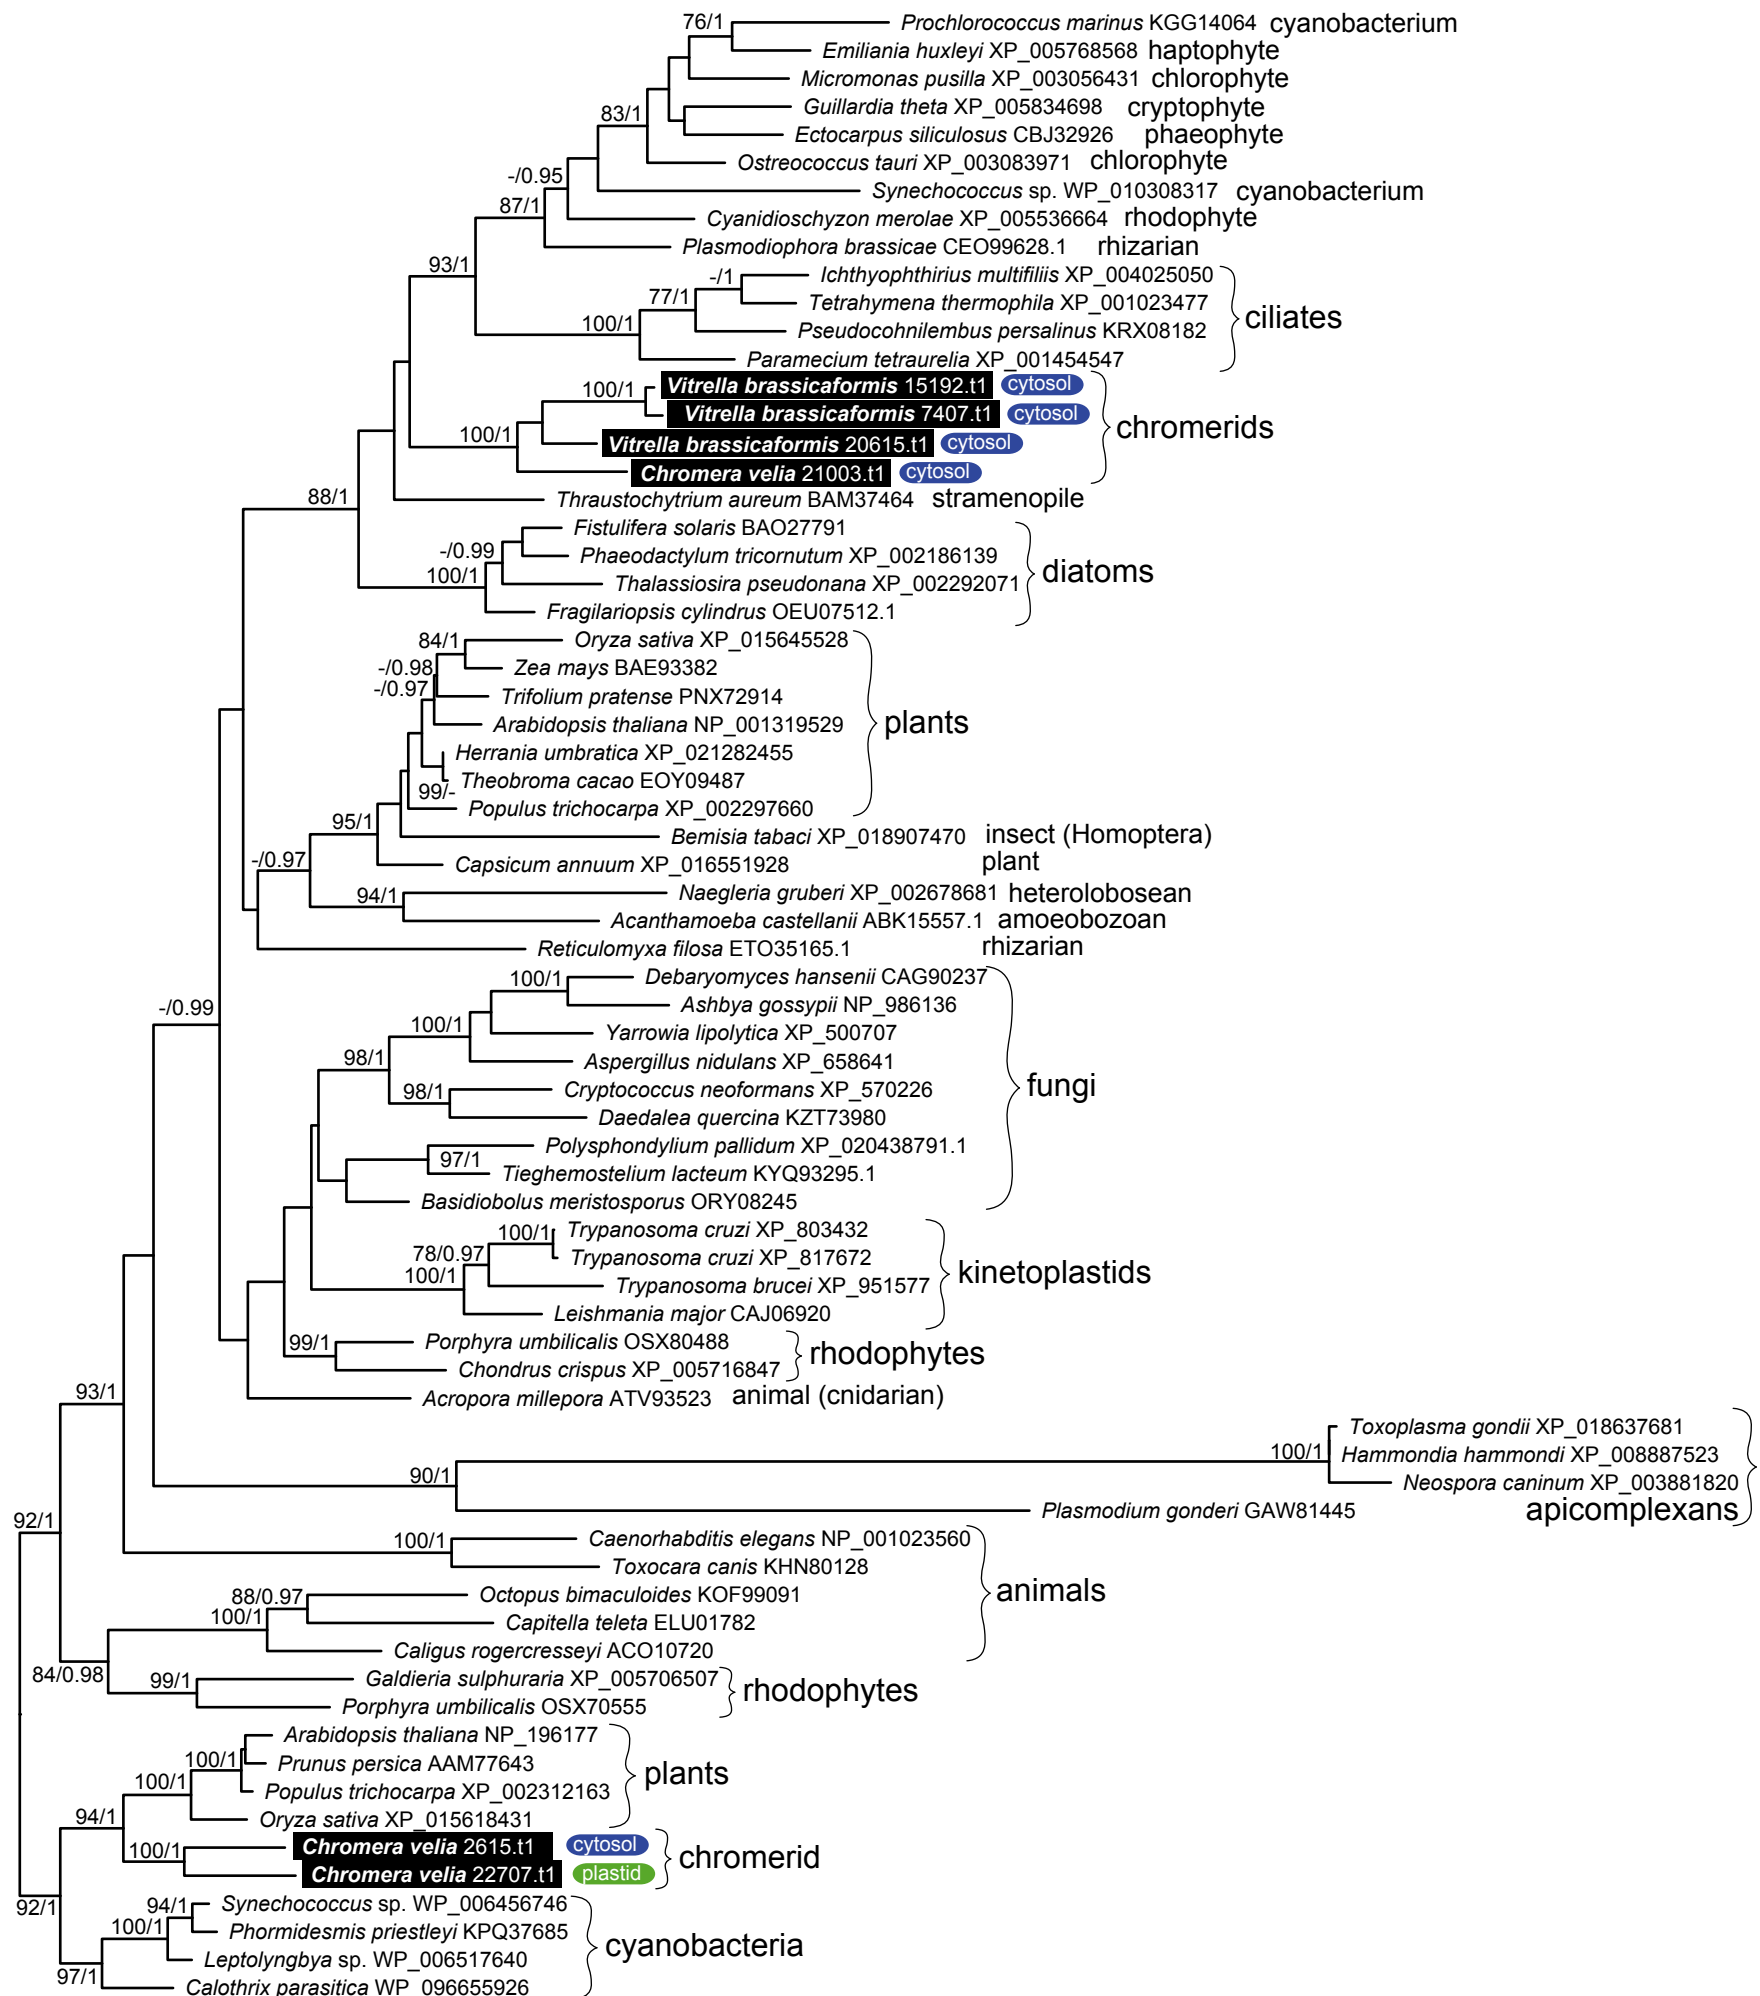

0.6

Supplement: s1 [file s1]

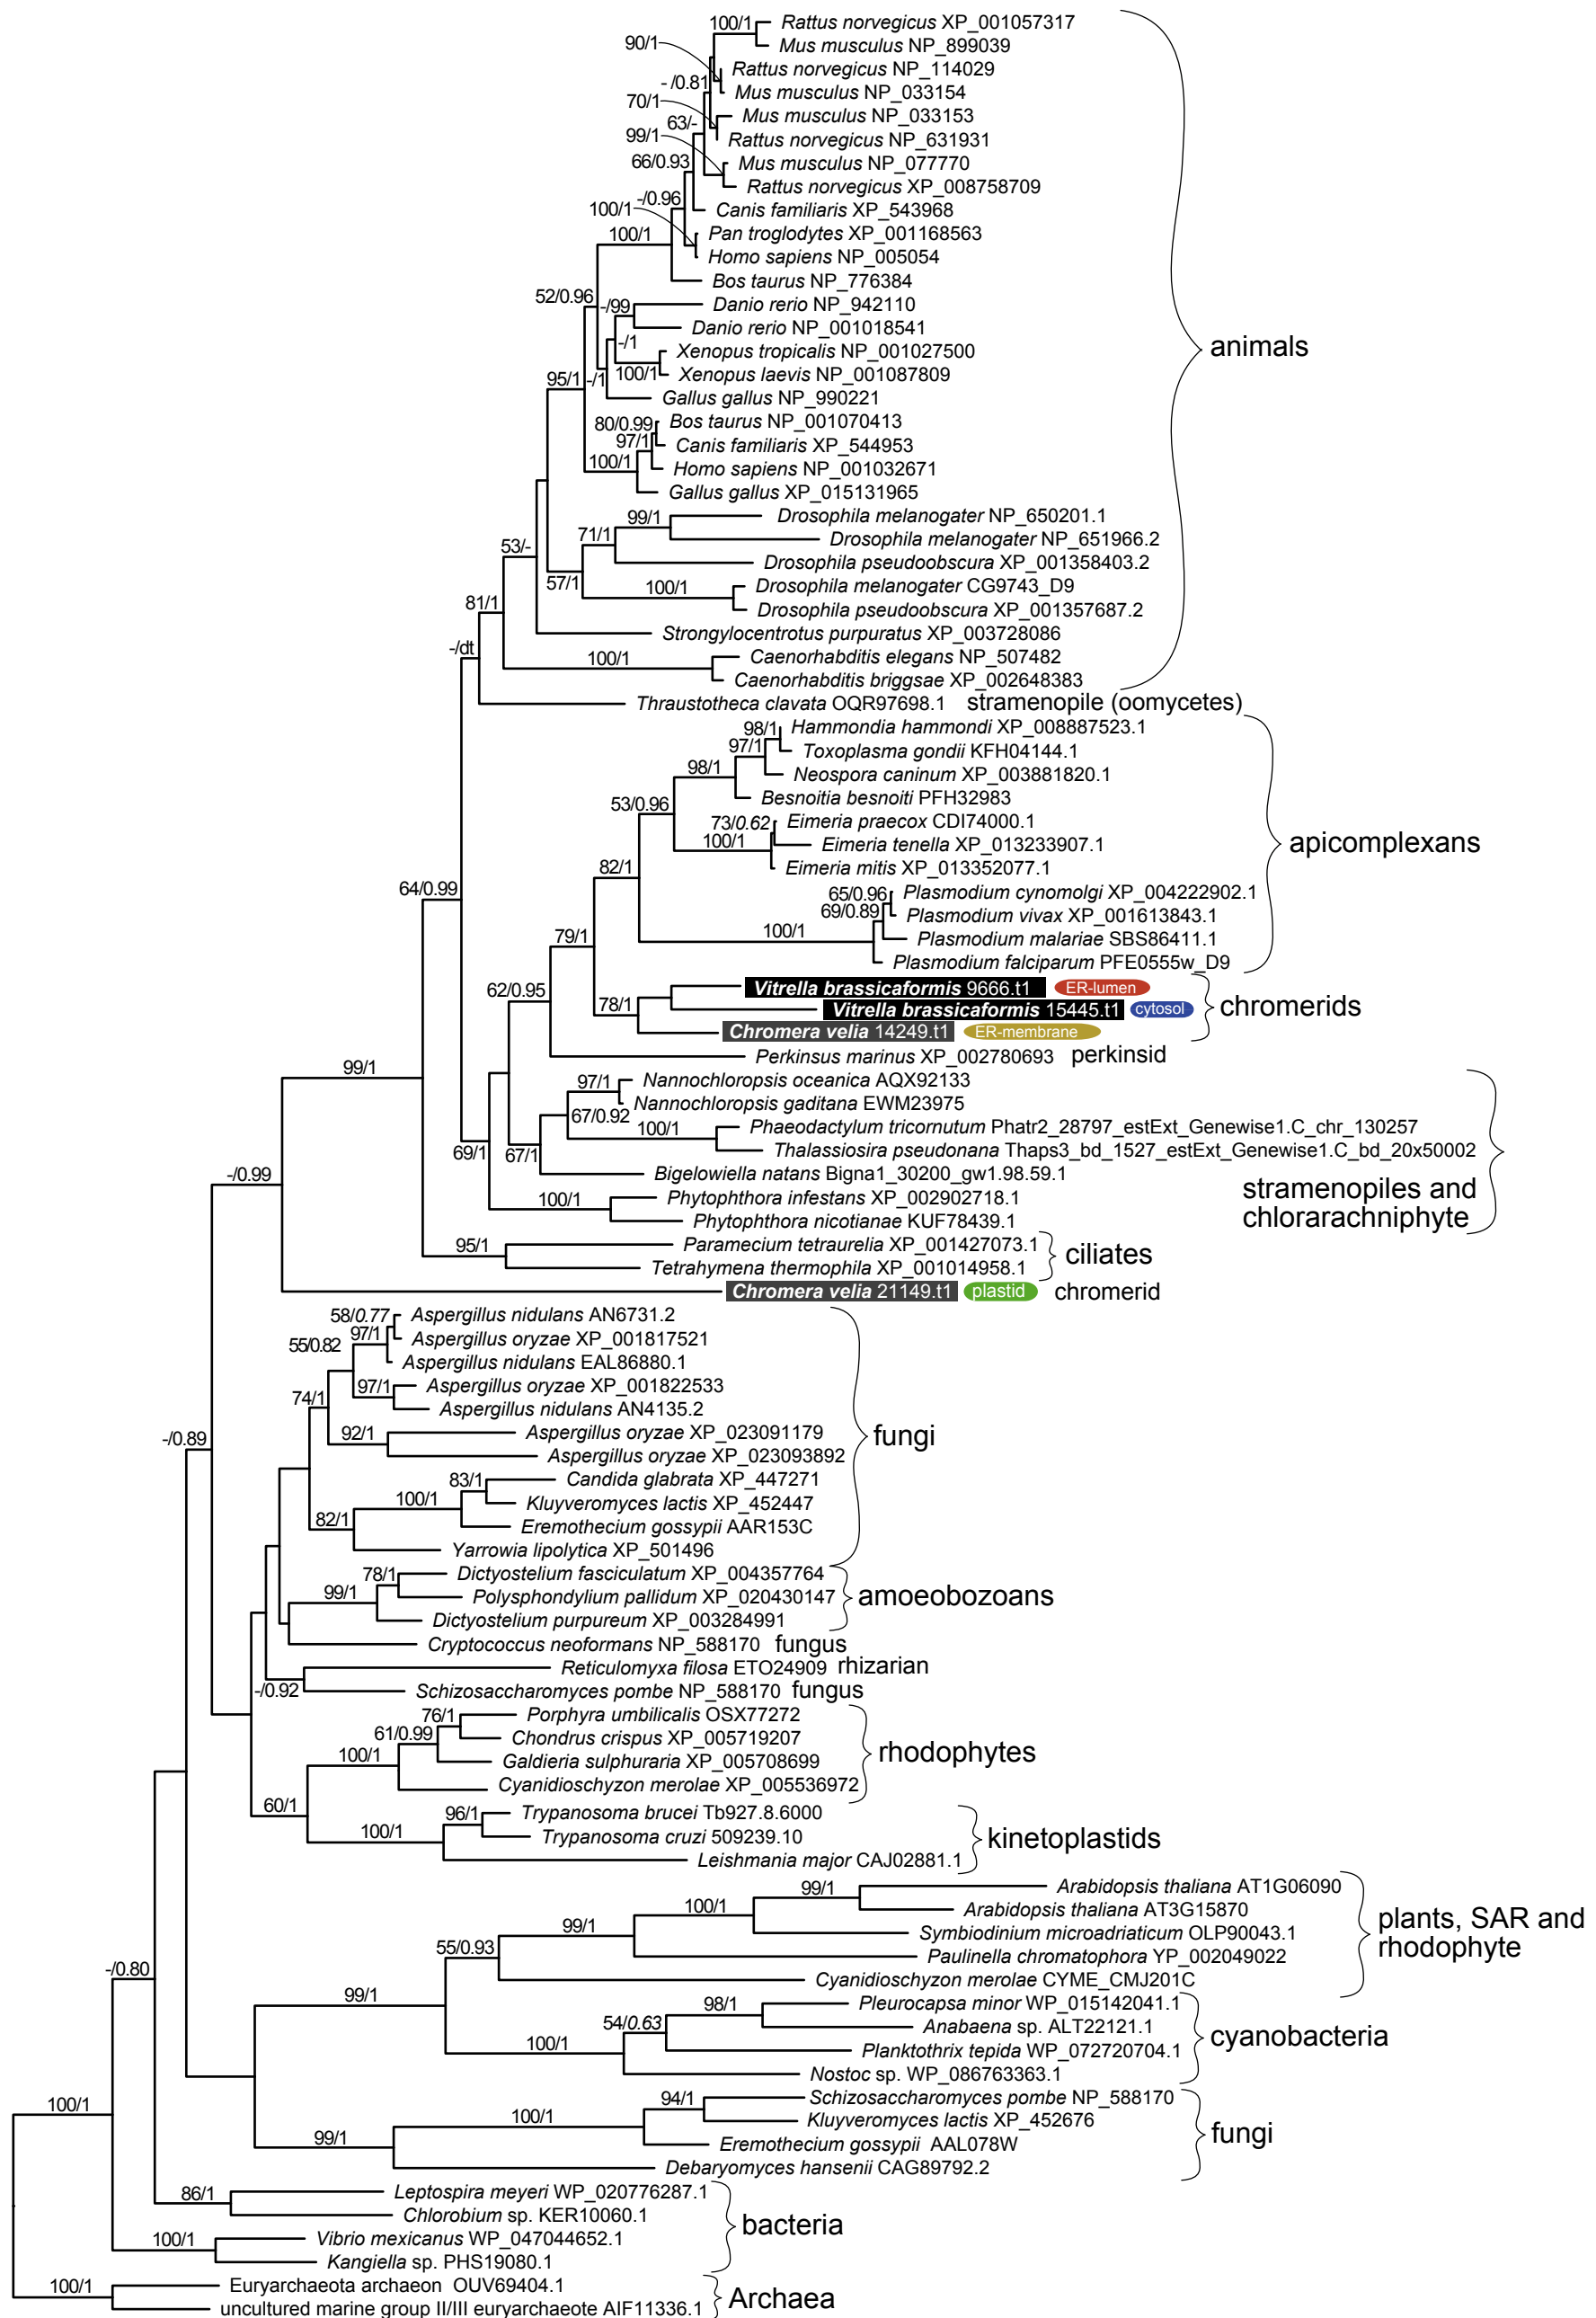

Supplement: s1 [file s1]

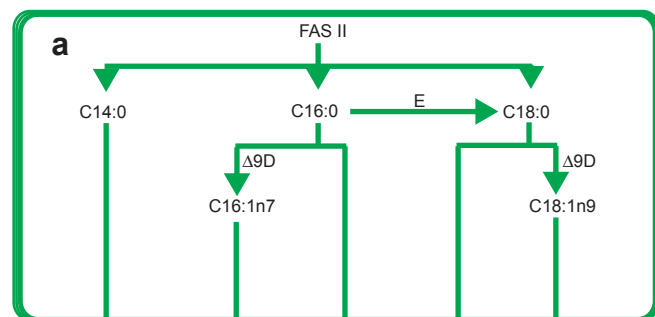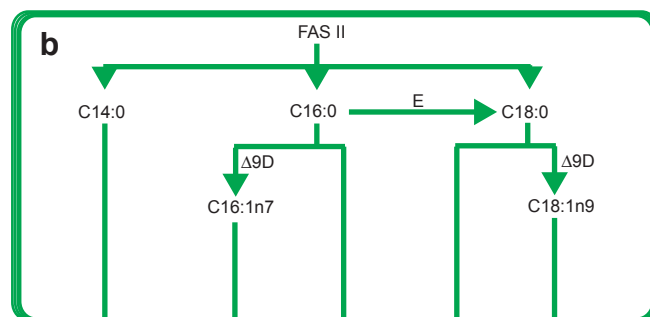

Supplement: s1 [file s1]

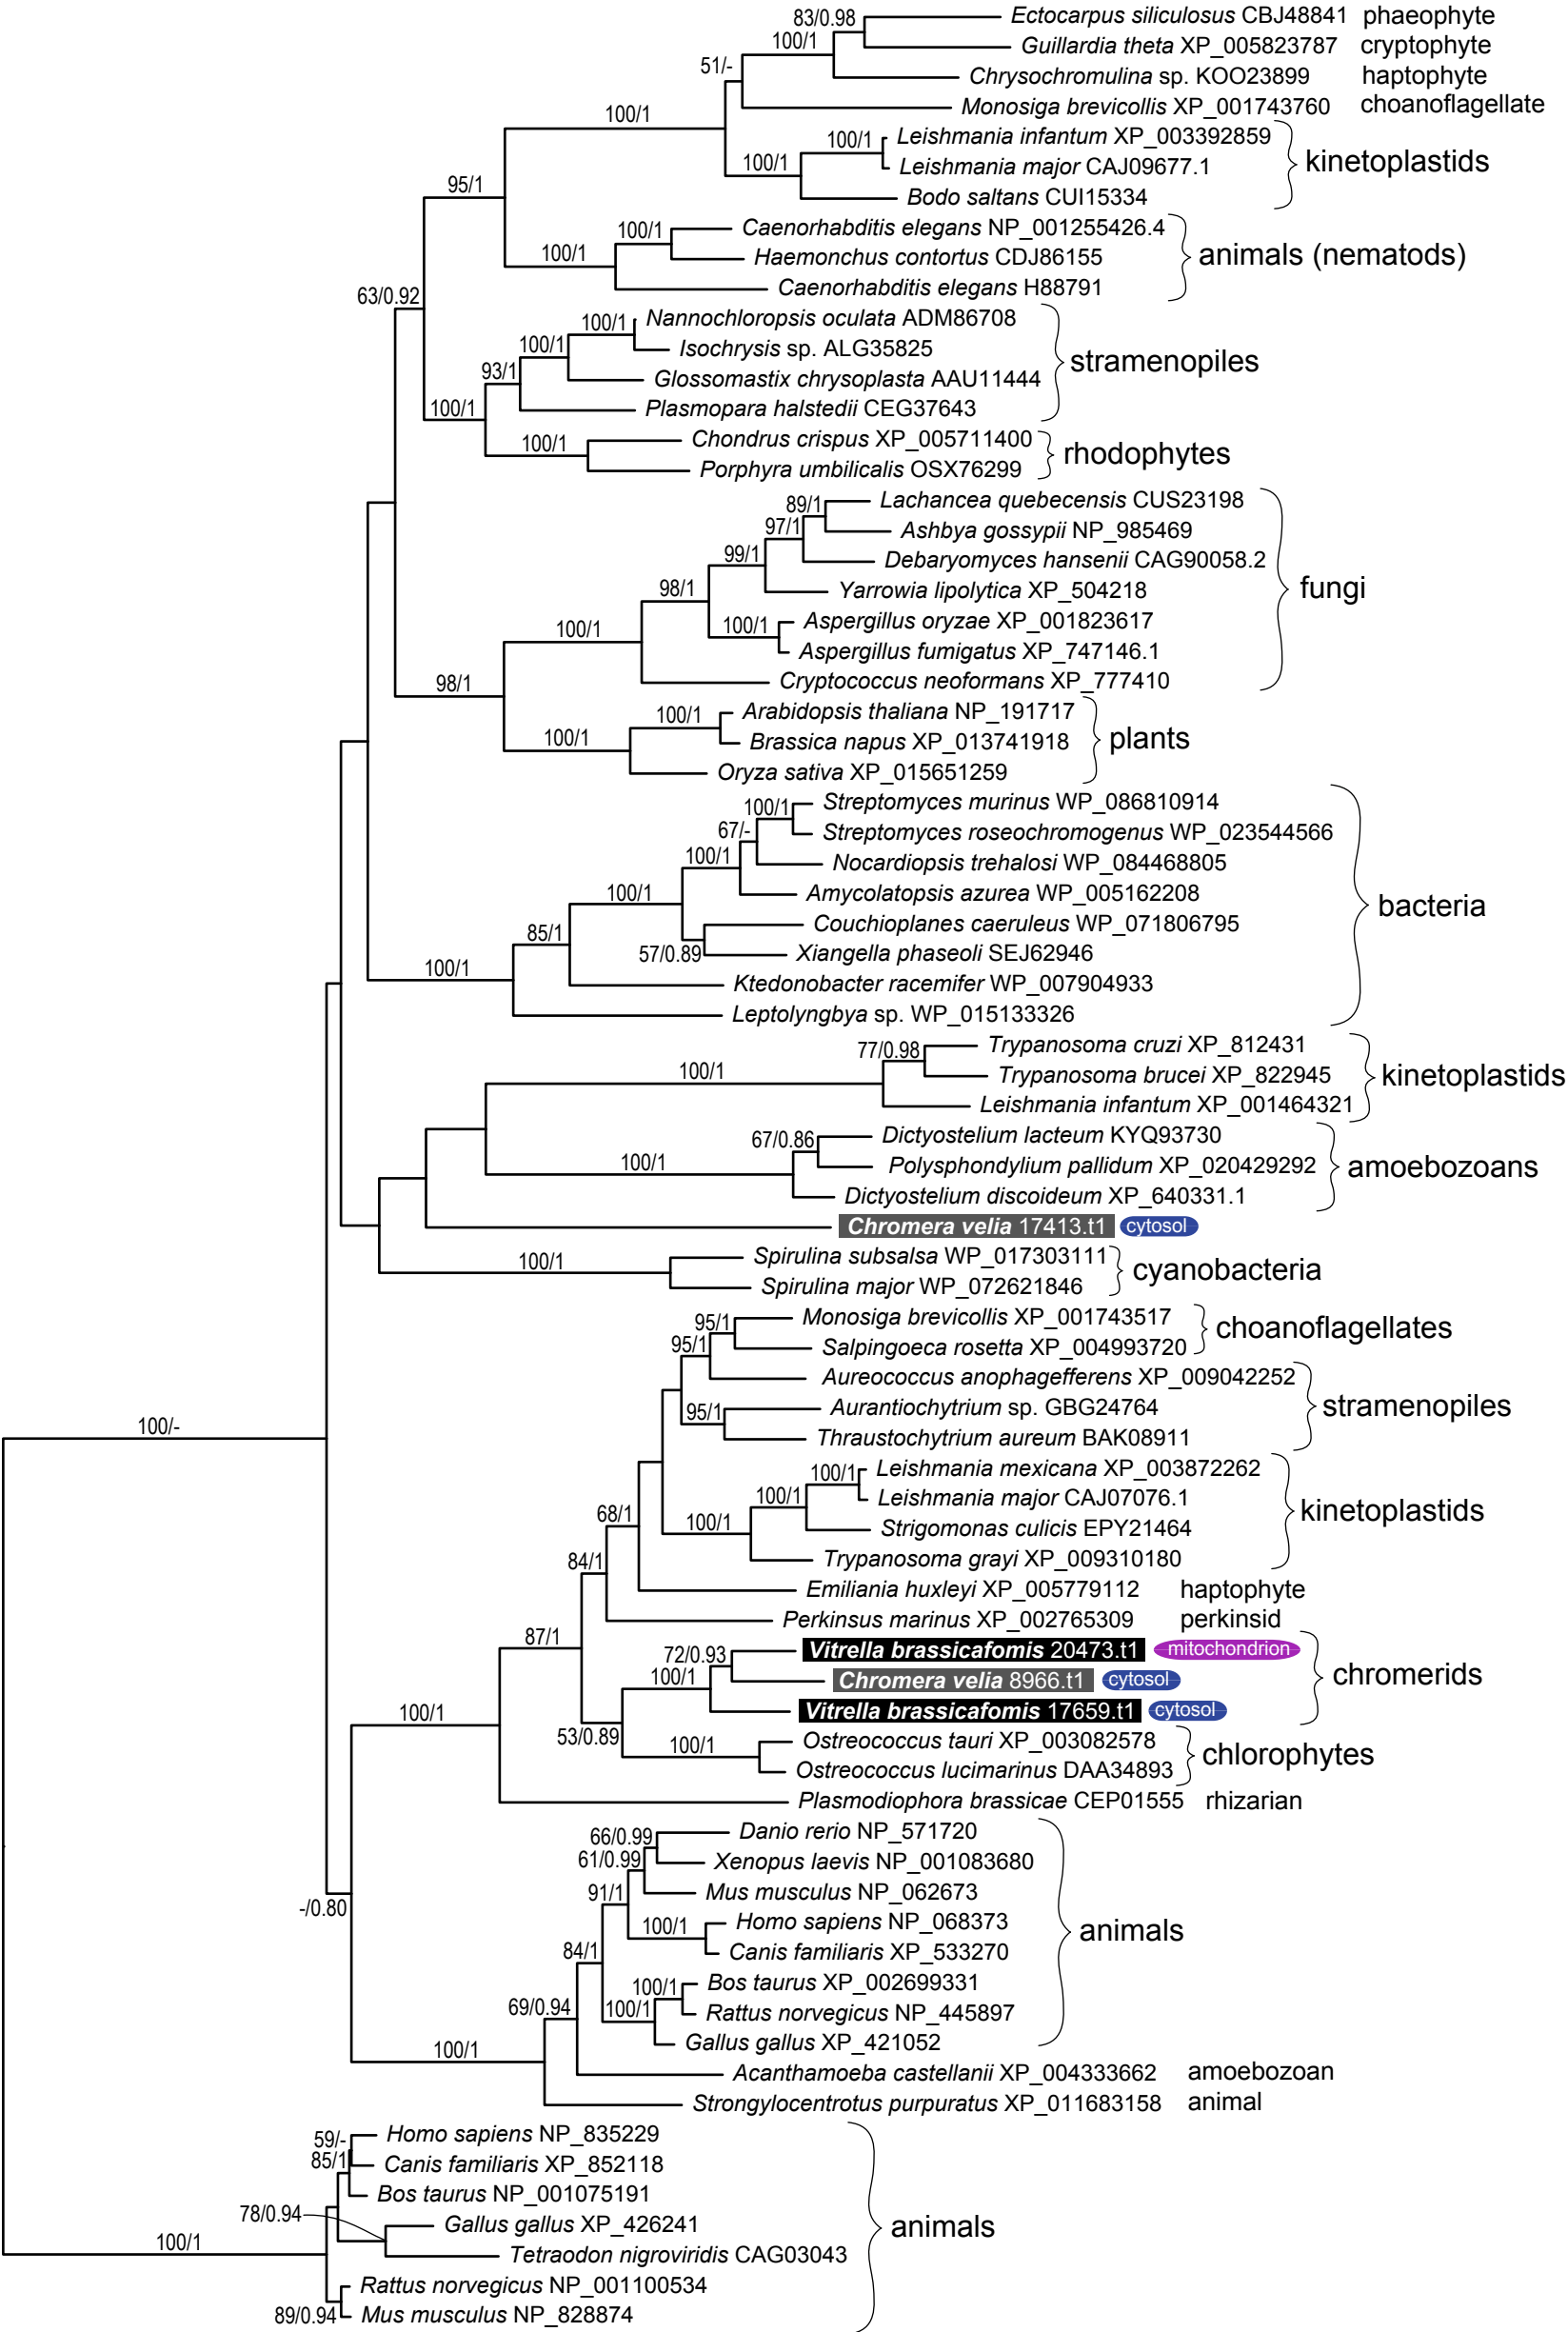

0.5

Supplement: s1 [file s1]

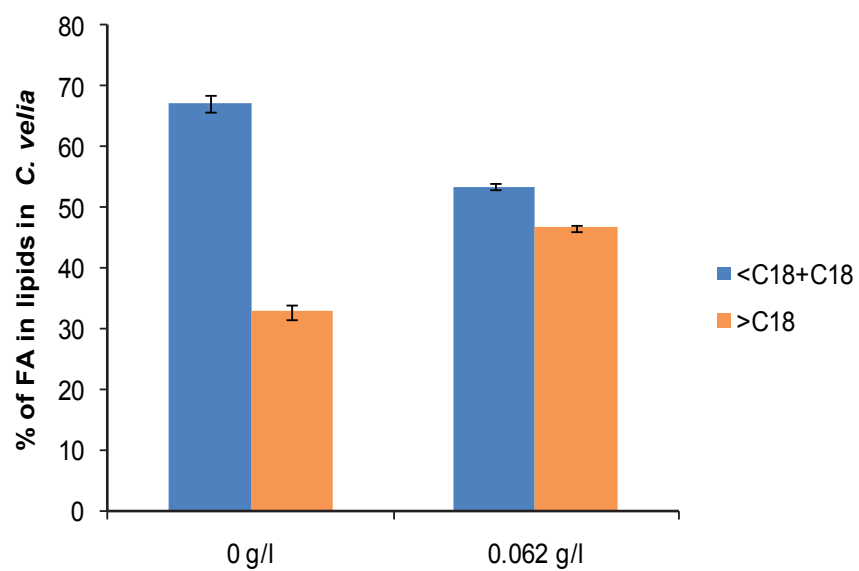

Supplement: s1 [file s1]
